# Supplementary material for: Community-Based Network Study of Protein-Carbohydrate Interactions in Plant Lectins Using Glycan Array Data
Source: PLoS One. 2014 Apr 22;9(4):e95480. doi: 10.1371/journal.pone.0095480 (PMC3995809; doi:10.1371/journal.pone.0095480)
Supplement: Table S3 — The list of meaningful glycan-specific groups and their P-values detected by MCL and MCODE at RFU ≥5000, RFU ≥10000 and RFU ≥20000. (XLS) [file pone.0095480.s003.xls]

## Sheet: RFU>=5000
Total number of statistically significant glycan specific groups as reported by MCODE at RFU>= 5000
Cluster	No. of protein members	Reported Specificity	P-value
3	11	Di-N-acetylchitobiose specific lectin.	0.0420474
5	10	High-mannose, Mana1-3Man, Mana1-6Man	0.0110383
		High-mannose, Mana1-6(Mana1-3)Man	0.0163324
6	11	Fuca1-3(Galb1-4)GlcNAc, Fuca1-2Galb1-4GlcNAc	0.0420474
Total number of statistically significant glycan specific groups as reported by MCL at RFU>= 5000
Cluster	No. of protein members	Reported Specificity	P-value
1	82	Galactose- and N-acetylgalactosamine-binding	0.000478387
		Galb1-4GlcNAc	0.00494135
		Chitin oligomers, Sia	0.00799079
		Siaa2-6Gal/GalNAc	0.0115525
		High-mannose, Mana1-6(Mana1-3)Man	0.0161075
		Galactose binding lectin	0.0321498
2	41	High-mannose, Mana1-3Man	0.00121812
		High-mannose, Mana1-3Man, Mana1-6Man	0.0030629
		Mannose binding lectin	0.00490767
		High-mannose, Mana1-6Man	0.0122248
3	13	Fuca1-6GlcNAc, Fuca1-3(Galb1-4)GlcNAc	8.31606e-06
		Fuca1-6GlcNAc (core fucose)	1.27852e-05

## Sheet: RFU>=10,000
Total number of statistically significant glycan specific groups as reported by MCL at RFU>= 10,000
Cluster No.	No. of members	Reported Specificity	P-value
1	44	Galα(1,3)Gal	0.0492207
		High-mannose, Mana1-3Man	0.00350296
		High-mannose, Mana1-6Man	0.00801268
		N-acetylglucosamine	0.0449686
2	22	Fuca1-6GlcNAc, Fuca1-3(Galb1-4)GlcNAc	4.06769e-06
		Fuca1-2Galb1 -> or GalNAcb1 -> groups at their nonreducing terminals	0.000113818
		Fuca1-6GlcNAc (core fucose)	0.000113818
		Gala1-3Gal, blood group B antigen	0.030487
3	26	Galactose- and N-acetylgalactosamine-binding	4.86492e-05
		Galactose binding lectin	0.000992417
4	27	Chitin oligomers, Sia	1.11048e-07
		GlcNAc oligomers, oligosaccharide containing GlcNAc and LacNAc	0.0312252
		GlcNAc trimers/tetramers	0.00192748
		Siaa2-3Galb1-	0.0198916
5	18	Galb1-4GlcNAc	0.00054848
		High-mannose, Mana1-6(Mana1-3)Man	0.00563771
		Siaa2-6Gal/GalNAc	0.0096166
6	15	a-Linked terminal GalNAc	0.0201279
		Galb1-3GalNAc, GalNAc	8.04609e-05
		N,N'-diacetyllactosediamine (GalNAcβ1-4GlcNAc, LacdiNAc)	0.0324335
No statistically significant glycan specific groups was reported by MCODE at RFU>= 10,000

## Sheet: RFU>=20,000
Total number of statistically significant glycan specific groups as reported by MCL at RFU>= 20,000
Cluster No.	No. of members	Reported Specificity	P-value
1	21	a-Linked terminal GalNAc	0.0353706
		Galb1->3GalNAc-a-	0.0497935
		Galb1-3GalNAc, GalNAc	0.00472307
2	24	Galb1-4GlcNAc	0.000168435
		GalNAcb1-4GlcNAc, Galb1-3(-6)GalNAc	0.0450689
		Siaa2-6Gal/GalNAc	0.000168435
3	25	a-Linked terminal GalNAc	0.0484811
		Galactose- and N-acetylgalactosamine-binding	3.18356e-05
		Galactose binding lectin	0.000414929
		Galb1-3GalNAc	0.0063975
4	17	Chitin oligomers, Sia	3.50383e-05
		GlcNAc trimers/tetramers	0.000508262
		Siaa2-3Galb1-3(Siaa2-6)GalNAc	0.00790347
		Tri/tetra-antennary complex-type N-glycan	0.00790347
No statistically significant glycan specific groups was reported by MCODE at RFU>= 20,000
