# Supplementary material for: Community-Based Network Study of Protein-Carbohydrate Interactions in Plant Lectins Using Glycan Array Data
Source: PLoS One. 2014 Apr 22;9(4):e95480. doi: 10.1371/journal.pone.0095480 (PMC3995809; doi:10.1371/journal.pone.0095480)
Supplement: Table S6 — List of diverse glycans that interact with the hub PP2A1 at RFU ≥5000 in the lectin-glycan network. (XLS) [file pone.0095480.s006.xls]

## Sheet: Glycan nodes for hub PP2A1
Chart #	Masterlist Name	RFU
366	GalNAca1-3(Fuca1-2)Galb1-4GlcNAcb1-2Mana1-3[GalNAca1-3(Fuca1-2)Galb1-4GlcNAcb1-2Mana1-6]Manb1-4GlcNAcb1-4GlcNAcb-Sp20	52574.8
175	Glca1-4Glcb–Sp8	51825.6
49	Mana1-3(Mana1-6)Manb1-4GlcNAcb1-4GlcNAcb-Sp13	50896.1
319	Neu5Aca2-6Galb1-4GlcNAcb1-2Mana1-3(Neu5Aca2-6Galb1-4GlcNAcb1-2Mana1-6)Manb1-4GlcNAcb1-4GlcNAcb-N(LT)AVL	49737.6
293	Galb1-4GlcNAcb1-2Mana1-3(Neu5Aca2-6Galb1-4GlcNAcb1-2Mana1-6)Manb1-4GlcNAcb1-4GlcNAcb-Sp12	48934.4
340	Mana1-3(Neu5Aca2-6Galb1-4GlcNAcb1-2Mana1-6)Manb1-4GlcNAcb1-4GlcNAc-Sp12	48454
50	GlcNAcb1-2Mana1-3(GlcNAcb1-2Mana1-6)Manb1-4GlcNAcb1-4GlcNAcb-Sp13	47662.8
316	Neu5Aca2-3Galb1-4GlcNAcb1-2Mana1-3(Neu5Aca2-6Galb1-4GlcNAcb1-2Mana1-6)Manb1-4GlcNAcb1-4GlcNAcb-Sp12	47259
337	GlcNAca1-4Galb1-4GlcNAcb1-3Galb1-4(Fuca1-3)GlcNAcb1-3Galb1-4(Fuca1-3)GlcNAcb-Sp0	47170.2
343	Neu5Aca2-6Galb1-4GlcNAcb1-2Mana1-3Manb1-4GlcNAcb1-4GlcNAc-Sp12	46211
197	Neu5Aca2-6Galb1-4GlcNAcb1-2Mana1-3(Neu5Aca2-3Galb1-4GlcNAcb1-2Mana1-6)Manb1-4GlcNAcb1-4GlcNAcb-Sp12	45783.2
4	Galb1-3GlcNAcb1-2Mana1-3(Galb1-3GlcNAcb1-2Mana1-6)Manb1-4GlcNAcb1-4GlcNAcb-Sp19	45315
356	Fuca1-2Galb1-3GlcNAcb1-2Mana1-3(Fuca1-2Galb1-3GlcNAcb1-2Mana1-6)Manb1-4GlcNAcb1-4GlcNAcb-Sp20	44254
367	Gala1-3(Fuca1-2)Galb1-4GlcNAcb1-2Mana1-3[Gala1-3(Fuca1-2)Galb1-4GlcNAcb1-2Mana1-6]Manb1-4GlcNAcb1-4GlcNAcb-Sp20	43709.9
341	Neu5Aca2-6Galb1-4GlcNAcb1-2Mana1-3(Mana1-6)Manb1-4GlcNAcb1-4GlcNAc-Sp12	43549.3
345	Galb1-4GlcNAcb1-2Mana1-6Manb1-4GlcNAcb1-4GlcNAc-Sp12	43417.6
302	GlcNAcb1-2Mana1-3(Neu5Aca2-6Galb1-4GlcNAcb1-2Mana1-6)Manb1-4GlcNAcb1-4GlcNAcb-Sp12	43240.8
171	GlcNAcb1-4GlcNAcb1-4GlcNAcb–Sp8	43013.1
318	Neu5Aca2-6Galb1-4GlcNAcb1-2Mana1-3(GlcNAcb1-2Mana1-6)Manb1-4GlcNAcb1-4GlcNAcb-Sp12	42962.3
308	Mana1-3(Mana1-6)Manb1-4GlcNAcb1-4GlcNAcb-Sp12	42443.9
314	Neu5Aca2-3Galb1-3(Neu5Aca2-6)GalNAc-Sp14	42426.3
191	Mana1-2Mana1-6(Mana1-3)Mana1-6(Mana2Mana2Mana1-3)Manb1-4GlcNAcb1-4GlcNAcb-Sp12	41893.7
169	(GlcNAcb1-4)6b-Sp8	40961.5
346	Galb1-4GlcNAcb1-2Mana1-3(Mana1-6)Manb1-4GlcNAcb1-4GlcNAcb-Sp12	40732.2
338	GlcNAca1-4Galb1-4GlcNAcb1-3Galb1-4GlcNAcb-Sp0	40366.9
52	Neu5Aca2-6Galb1-4GlcNAcb1-2Mana1-3(Neu5Aca2-6Galb1-4GlcNAcb1-2Mana1-6)Manb1-4GlcNAcb1-4GlcNAcb-Sp13	40355
303	GlcNAcb1-2Mana1-3(GlcNAcb1-2Mana1-6)Manb1-4GlcNAcb1-4GlcNAcb-Sp12	40342.4
190	Mana1-6(Mana1-2Mana1-3)Mana1-6(Mana2Mana1-3)Manb1-4GlcNAcb1-4GlcNAcb-Sp12	39468.4
374	Fuca1-3[NeuAca2-3Galb1-4]GlcNAcb1-3GalNAc-Sp14	39183.5
141	Neu5Aca2-3Galb1-4GlcNAcb1-2Mana1-3(Neu5Aca2-3Galb1-4GlcNAcb1-2Mana1-6)Manb1-4GlcNAcb1-4GlcNAcb-Sp12	39083.5
16	b-D-Gal–Sp8	38451.1
317	Neu5Aca2-6Galb1-4GlcNAcb1-2Mana1-3(Galb1-4GlcNAcb1-2Mana1-6)Manb1-4GlcNAcb1-4GlcNAcb-Sp12	38357.8
285	[3OSO3][4OSO3]Galb1-4GlcNacb-SpSp0	37890.2
53	Neu5Aca2-6Galb1-4GlcNAcb1-2Mana1-3(Neu5Aca2-6Galb1-4GlcNAcb1-2Mana1-6)Manb1-4GlcNAcb1-4GlcNAcb-Sp8	37491.7
359	Gala1-3Galb1-4GlcNAcb1-2Mana1-3(Gala1-3Galb1-4GlcNAcb1-2Mana1-6)Manb1-4GlcNAcb1-4GlcNAcb-Sp20	37068.9
342	Neu5Aca2-6Galb1-4GlcNAcb1-2Mana1-6Manb1-4GlcNAcb1-4GlcNAc-Sp12	36383
39	[4OSO3]Galb1-4GlcNAcb-Sp8	36374.7
339	GlcNAca1-4Galb1-3GalNAc-Sp14	36372.1
51	Galb1-4GlcNAcb1-2Mana1-3(Galb1-4GlcNAcb1-2Mana1-6)Manb1-4GlcNAcb1-4GlcNAcb-Sp13	35957.2
170	(GlcNAcb1-4)5b-Sp8	35867.9
348	Galb1-4GlcNAcb1-2Mana1-3(Galb1-4GlcNAcb1-2Mana1-6)Manb1-4GlcNAcb1-4(Fuca1-6)GlcNAcb-Sp22	35603.6
192	Mana1-2Mana1-2Mana1-3(Mana1-2Mana1-3(Mana1-2Mana1-6)Mana1-6)Manb1-4GlcNAcb1-4GlcNAcb-Sp12	34225.3
347	GlcNAcb1-2Mana1-3(GlcNAcb1-2Mana1-6)Manb1-4GlcNAcb1-4(Fuca1-6)GlcNAcb-Sp22	33909.4
195	Mana1-6(Mana1-3)Mana1-6(Mana2Mana1-3)Manb1-4GlcNAcb1-4GlcNAcb-Sp12	33902
344	Galb1-4GlcNAcb1-2Mana1-3Manb1-4GlcNAcb1-4GlcNAc-Sp12	33398.1
351	(6SO3)GlcNAcb1-3Gal b1-4GlcNAc-b-Sp0	33262.9
349	Galb1-3GlcNAcb1-2Mana1-3(Galb1-3GlcNAcb1-2Mana1-6)Manb1-4GlcNAcb1-4(Fuca1-6)GlcNacb-Sp22	32484.5
361	Galb1-3(Fuca1-4)GlcNAcb1-2Mana1-3[Galb1-3(Fuca1-4)GlcNAcb1-2Man a1-6]Manb1-4GlcNAcb1-4(Fuca1-6)GlcNAcb-Sp22	32129.8
357	Fuca1-2Galb1-4GlcNAcb1-2Mana1-3(Fuca1-2Galb1-4GlcNAcb1-2Mana1-6)Manb1-4GlcNAcb1-4GlcNAcb-Sp20	32071.8
350	Galb1-3(Fuca1-4)GlcNAcb1-2Mana1-3[Galb1-3(Fuca1-4)GlcNAcb1-2Mana1-6]Manb1-4GlcNAcb1-4GlcNAcb-Sp19	32017.4
196	Mana1-6(Mana1-3)Mana1-6(Mana1-3)Manb1-4GlcNAcb1-4 GlcNAcb-Sp12	31938
360	Mana1-3(Galb1-4GlcNAcb1-2Mana1-6)Manb1-4GlcNAcb1-4GlcNAcb-Sp12	31626.2
370	Gala1-3(Fuca1-2)Galb1-3GlcNAcb1-2Mana1-3[Gala1-3(Fuca1-2)Galb1-3GlcNAcb1-2Mana1-6]Manb1-4GlcNAcb1-4GlcNAcb-Sp20	31260.1
38	[4OSO3][6OSO3]Galb1-4GlcNAcb-Sp0	31234.1
371	Fuca1-2Galb1-3(Fuca1-4)GlcNAcb1-2Mana1-3[Fuca1-2Galb1-3(Fuca1-4)GlcNAcb1-2Mana1-6]Manb1-4GlcNAcb1-4GlcNAcb-Sp19	30799.8
355	KDNa2-3Galb1-3GalNAca-Sp14	28478.8
26	[3OSO3][6OSO3]Galb1-4GlcNAcb-Sp0	28418.7
47	9NAcNeu5Aca-Sp8	28086
375	GalNAcb1-4GlcNAcb1-2Mana1-6(GalNAcb1-4GlcNAcb1-2Mana1-6)Manb1-4GlcNAcb1-4GlcNAc-Sp12	26964.4
265	[3OSO3]Galb1-4[Fuca1-3][6OSO3]GlcNAc-Sp8	25049.4
365	Galb1-4GlcNAcb1-2(Galb1-4GlcNAcb1-4)Mana1-3[Galb1-4GlcNAcb1-2Mana1-6]Manb1-4GlcNAcb1-4GlcNAc-Sp21	24180.4
326	NeuAca2-3Galb1-3(Fuca1-4)GlcNAcb1-3Galb1-3(Fuca1-4)GlcNAcb-Sp0	22081.9
28	[3OSO3]Galb1-4(6OSO3)Glcb–Sp0	21824.8
262	Neu5Gca-Sp8	20933.4
334	GlcNAca1-4Galb1-4GlcNAcb-Sp0	19004
368	Gala1-3Galb1-4(Fuca1-3)GlcNAcb1-2Mana1-3[Gala1-3Galb1-4(Fuca1-3)GlcNAcb1-2Mana1-6]Manb1-4GlcNAcb1-4GlcNAcb-Sp20	18882.5
358	Fuca1-2Galb1-4(Fuca1-3)GlcNAcb1-2Mana1-3[Fuca1-2Galb1-4(Fuca1-3)GlcNAcb1-2Mana1-6]Manb1-4GlcNAcb1-4GlcNAb-Sp20	18606.9
332	(Neu5Aca2-3-Galb1-3)(((Neu5Aca2-3-Galb1-4(Fuca1-3))GlcNAcb1-6)GalNAc–Sp14	18504.1
44	[6OSO3]Galb1-4[6OSO3]Glcb-Sp8	18196.9
169	(GlcNAcb1-4)6b-Sp8	18172.8
331	GalNAca1-3(Fuca1-2)Galb1-4GlcNAcb1-3Galb1-4GlcNAcb1-3Galb1-4GlcNAcb-Sp0	17704.5
286	[6OSO3]Galb1-4[6OSO3]GlcNacb-Sp0	17677.7
225	Neu5Aca2-3Galb1-4[6OSO3]GlcNAcb-Sp8	17574.8
328	Gala1-4Galb1-4GlcNAcb1-3Galb1-4Glcb-Sp0	17256.1
330	GalNAca1-3(Fuca1-2)Galb1-4GlcNAcb1-3Galb1-4GlcNAcb-Sp0	16677.2
269	Fuca1-2[6OSO3]Galb1-4[6OSO3]Glc-Sp0	16344
67	Fuca1-2Galb1-4(Fuca1-3)GlcNAcb–Sp8	15786.6
263	[3OSO3]Galb1-4(Fuca1-3)(6OSO3)Glc-Sp0	15505.5
25	[3OSO3][6OSO3]Galb1-4[6OSO3]GlcNAcb-Sp0	14762.8
291	Galb1-3(Neu5Aca2-3Galb1-4(Fuca1-3)GlcNAcb1-6)GalNAc–Sp14	14649.8
336	GlcNAca1-4Galb1-4GlcNAcb1-3Galb1-4Glcb-Sp0	14260.8
199	Fuca1-3(Galb1-4)GlcNAcb1-2Mana1-3(Fuca1-3(Galb1-4)GlcNAcb1-2Mana1-6)Manb1-4GlcNAcb1-4GlcNAcb-Sp20	13649.4
301	GlcAb1-3GlcNAcb-Sp8	13474
45	NeuAca2-3[6OSO3]Galb1-4GlcNAcb–Sp8	13433.8
36	[3OSO3]Galb1-4GlcNAcb-Sp8	13241
34	[3OSO3]Galb1-4[6OSO3]GlcNAcb-Sp8	13146.8
216	NeuAca2-3Galb1-3(Fuca1-4)GlcNAcb1-3Galb1-4(Fuca1-3)GlcNAcb Sp0	13093.7
135	Galb1-4(Fuca1-3)GlcNAcb1-4Galb1-4(Fuca1-3)GlcNAcb-Sp0	12738.2
287	6-H2PO3Glcb-Sp10	12471
40	6-H2PO3Mana-Sp8	12377.3
95	Gala1-3(Fuca1-2)Galb1-4GlcNAc-Sp0	12241
143	Galb1-4GlcNAcb1-3Galb1-4(Fuca1-3)GlcNAcb1-3Galb1-4(Fuca1-3)GlcNAcb-Sp0	12113.5
37	[3OSO3]Galb–Sp8	12066.7
208	Neu5Aca2-3(GalNAcb1-4)Galb1-4GlcNAcb-Sp8	11919
68	Fuca1-2Galb1-4GlcNAcb1-3Galb1-4GlcNAc–Sp0	11644.9
43	[6OSO3]Galb1-4GlcNAcb–Sp8	11560.2
14	a-Neu5Ac–Sp11	11490.2
107	Gala1-4Galb1-4GlcNAcb–Sp0	11017.9
12	a-L-Rha-Sp8	10912.1
27	[3OSO3]Galb1-4Glcb-Sp8	10695.8
278	Galb1-4[Fuca1-3][6OSO3]GlcNAc-Sp0	10689.3
137	Galb1-4[6OSO3]Glcb–Sp0	10679.7
35	[3OSO3]Galb1-4GlcNAcb–Sp0	10575.9
58	Fuca1-2Galb1-3GalNAcb1-4(Neu5Aca2-3)Galb1-4Glcb-Sp0	10553.8
352	KDNa2-3Galb1-4(Fuca1-3)GlcNAc-Sp0	10278.6
29	[3OSO3]Galb1-4(6OSO3)Glcb–Sp8	10020.3
333	GlcNAca1-4Galb1-4GlcNAcb1-3Galb1-4GlcNAcb1-3Galb1-4GlcNAcb-Sp0	9982.81
10	a-L-Fuc–Sp8	9832.61
101	Gala1-3Galb1-4(Fuca1-3)GlcNAcb–Sp8	9632.79
177	Glca1-6Glca1-6Glcb-Sp8	9598.38
327	NeuAca2-6Galb1-4GlcNAcb1-3Galb1-4GlcNAcb1-3Galb1-4GlcNAcb-Sp0	9468.89
112	Galb1-2Galb–Sp8	9456.99
280	Galb1-4(Fuca1-3)GlcNAcb1-3Galb1-3(Fuca1-4)GlcNAcb-Sp0	9363.67
8	a-D-Man–Sp8	9336.37
152	Galb1-4Glcb–Sp0	9317.82
231	Neu5Aca2-3Galb1-4(Fuca1-3)GlcNAcb1-3Galb1-4GlcNAcb-Sp8	9306.19
5	Neu5Aca2-6Galb1-4GlcNAcb1-2Mana1-3(Neu5Aca2-6Galb1-4GlcNAcb1-2Mana1-6)Manb1-4GlcNAcb1-4GlcNAcb-Sp12	9093.82
213	Neu5Aca2-3GalNAcb1-4GlcNAcb-Sp0	9028.94
94	Gala1-3(Fuca1-2)Galb1-4(Fuca1-3)GlcNAcb-Sp0	9021.42
276	Galb1-3GalNAc-Sp14	9020.34
179	Glcb1-6Glcb-Sp8	9011.89
240	Neu5Aca2-6GalNAca-Sp8	8904.92
3	Neu5Gcb2-6Galb1-4GlcNAc-Sp8	8864.55
279	Galb1-4[Fuca1-3][6OSO3]Glc-Sp0	8710.98
250	Neu5Aca2-8Neu5Aca-Sp8	8592.75
131	Galb1-3GlcNAcb–Sp0	8524.77
223	Neu5Aca2-3Galb1-3GlcNAcb–Sp0	8493.16
106	Gala1-4(Fuca1-2)Galb1-4GlcNAcb-Sp8	8464.08
268	Fuca1-2Galb1-4[6OSO3]GlcNAc-Sp8	8459.96
272	Galb1-3(Fuca1-4)GlcNAcb1-3Galb1-3(Fuca1-4)GlcNAcb-Sp0	8426.3
46	[6OSO3]GlcNAcb–Sp8	8419.58
227	Neu5Aca2-3Galb1-4(Fuca1-3)GlcNAcb1-3Galb1-4(Fuca1-3)GlcNAcb1-3Galb1-4(Fuca1-3)GlcNAcb–Sp0	8348.11
315	Neu5Aca2-3Galb1-3GalNAc–Sp14	8311.41
284	[3OSO3]Galb1-4[6OSO3]GlcNAcb-Sp0	8309.51
214	Neu5Aca2-3Galb1-3(6OSO3)GlcNAc-Sp8	8130.8
62	Fuca1-2Galb1-3GlcNAcb–Sp0	8080.02
207	Neu5Aca2-3(GalNAcb1-4)Galb1-4GlcNAcb-Sp0	7970.75
258	Neu5Gca2-3Galb1-4GlcNAcb–Sp0	7952.97
275	Galb1-3-(Neu5Aa2-3Galb1-4GlcNacb1-6)GalNAc-Sp14	7875.87
105	Gala1-3Galb–Sp8	7796.42
15	b-Neu5Ac-Sp8	7790.33
116	Galb1-3(Fuca1-4)GlcNAc–Sp8	7760.84
237	Neu5Aca2-3Galb1-4Glcb–Sp0	7705.3
248	Neu5Aca2-6Galb1-4Glcb–Sp8	7702.87
100	Gala1-3GalNAcb–Sp8	7689.79
335	GlcNAca1-4Galb1-3GlcNAcb-Sp0	7646.32
89	GalNAcb1-4(Fuca1-3)GlcNAcb-Sp0	7622.33
264	[3OSO3]Galb1-4(Fuca1-3)Glc-Sp0	7553.88
17	b-D-Glc–Sp8	7539.13
305	GlcNAcb1-4GlcNAcb-Sp10	7509.79
178	Glcb1-4Glcb-Sp8	7442.6
180	G-ol-Sp8	7425.43
128	Galb1-3Galb–Sp8	7373.75
168	GlcNAcb1-4Galb1-4GlcNAcb-Sp8	7339.97
78	GalNAca1-3(Fuca1-2)Galb1-4(Fuca1-3)GlcNAcb-Sp0	7334.46
18	b-D-Man–Sp8	7212.44
353	KDNa2-6Galb1-4GlcNAc-Sp0	7054.64
242	Neu5Aca2-6Galb1-4[6OSO3]GlcNAcb-Sp8	7028.77
69	Fuca1-2Galb1-4GlcNAcb1-3Galb1-4GlcNAcb1-3Galb1-4GlcNAcb-Sp0	7022.7
41	[6OSO3]Galb1-4Glcb–Sp0	6951.8
138	Galb1-4[6OSO3]Glcb–Sp8	6913.07
325	NeuAca2-6Galb1-4GlcNAcb1-3Galb1-3GlcNAcb-Sp0	6906.19
59	Fuca1-2Galb1-3GalNAcb1-4(Neu5Aca2-3)Galb1-4Glcb-Sp9	6900.98
11	a-L-Fuc–Sp9	6895.2
260	Neu5Gca2-6GalNAca-Sp0	6883.62
309	Mana1-6Manb-Sp10	6845.05
369	GalNAca1-3(Fuca1-2)Galb1-3GlcNAcb1-2Mana1-3[GalNAca1-3(Fuca1-2)Galb1-3GlcNAcb1-2Mana1-6]Manb1-4GlcNAcb1-4GlcNAcb-Sp20	6839.16
103	Gala1-3Galb1-4GlcNAcb–Sp8	6828.78
149	Galb1-4GlcNAcb1-6GalNAca-Sp8	6724.99
317	Neu5Aca2-6Galb1-4GlcNAcb1-2Mana1-3(Galb1-4GlcNAcb1-2Mana1-6)Manb1-4GlcNAcb1-4GlcNAcb-Sp12	6683.33
363	Neu5Aca2-6GlcNAcb1-4GlcNAcb1-4GlcNAc-Sp21	6665.98
91	GalNAcb1-4GlcNAcb–Sp8	6660.49
183	GlcAb1-3Galb-Sp8	6652.95
226	Neu5Aca2-3Galb1-4(Fuca1-3)(6OSO3)GlcNAcb–Sp8	6626.96
271	Fuca1-2-Galb1-4[6OSO3]Glc-Sp0	6541.24
212	Neu5Aca2-3GalNAca-Sp8	6514.57
354	KDNa2-3Galb1-4Glc-Sp0	6509.91
186	KDNa2-3Galb1-4GlcNAcb–Sp0	6475.69
145	Galb1-4GlcNAcb1-3Galb1-4GlcNAcb–Sp0	6461.55
66	Fuca1-2Galb1-4(Fuca1-3)GlcNAcb–Sp0	6408.44
108	Gala1-4Galb1-4GlcNAcb–Sp8	6387.13
154	GlcNAca1-3Galb1-4GlcNAcb-Sp8	6371.32
246	Neu5Aca2-6Galb1-4GlcNAcb1-3Galb1-4GlcNAcb-Sp0	6343.77
251	Neu5Aca2-8Neu5Aca2-3Galb1-4Glcb–Sp0	6328.28
142	Galb1-4GlcNAcb1-3GalNAca-Sp8	6313.18
92	Gala1-2Galb–Sp8	6268.7
217	Neu5Aca2-3Galb1-3(Neu5Aca2-3Galb1-4)GlcNAcb-Sp8	6196.23
307	HOOC(CH3)CH-3-O-GlcNAcb1-4GlcNAcb-Sp10	6190.62
320	Fuca1-2Galb1-3GalNAca-Sp14	6147.03
23	(Galb1-4GlcNAcb)2-3,6-GalNAca-Sp8	6123.42
150	Galb1-4GlcNAcb–Sp0	6067.37
13	a-Neu5Ac–Sp8	6066.76
252	Neu5Acb2-6GalNAca-Sp8	6041.32
295	Galb1-4GlcNAcb1-3(GlcNAcb1-6)Galb1-4GlcNAc-Sp0	6037.42
153	Galb1-4Glcb–Sp8	6009.19
306	GlcNAcb1-4GlcNAcb-Sp12	6001.07
362	Neu5Aca2-6GlcNAcb1-4GlcNAc-Sp21	5977.76
64	Fuca1-2Galb1-4(Fuca1-3)GlcNAcb1-3Galb1-4(Fuca1-3)GlcNAcb-Sp0	5977.36
373	NeuAca2-6Galb1-4GlcNAcb1-3GalNAc-Sp14	5947.1
151	Galb1-4GlcNAcb–Sp8	5934.8
132	Galb1-3GlcNAcb–Sp8	5901.52
2	Neu5Aca2-8Neu5Aca2-8Neu5Acb-Sp8	5887.39
218	Neu5Aca2-3Galb1-3[6OSO3]GalNAca-Sp8	5878.58
321	Galb1-3(Neu5Aca2-6)GalNAca-Sp14	5850.27
55	Fuca1-2Galb1-3GalNAcb1-3Gala1-4Galb1-4Glcb-Sp9	5835.93
298	GalNAca-Sp15	5831.31
322	Galb1-4GlcNAcb1-3GalNAc-Sp14	5825.98
329	GalNAcb1-3Gala1-4Galb1-4GlcNAcb1-3Galb1-4Glcb-Sp0	5820.98
273	Galb1-3-(Galb1-4GlcNacb1-6)GalNAc-Sp14	5791.9
323	NeuAc(9Ac)a2-3Galb1-4GlcNAcb-Sp0	5788.92
228	Neu5Aca2-3Galb1-4(Fuca1-3)GlcNAcb–Sp0	5768.2
20	b-GlcNAc–Sp0	5741.51
254	Galb1-4GlcNAcb1-2Mana1-3(Neu5Aca2-6Galb1-4GlcNAcb1-2Mana1-6)Manb1-4GlcNAcb1-4GlcNAcb-Sp21	5688.53
270	Fuca1-2-(6OSO3)-Galb1-4Glc-Sp0	5688.33
33	[3OSO3]Galb1-4(Fuca1-3)GlcNAcb–Sp8	5679.15
84	GalNAca1-3Galb–Sp8	5668.51
19	b-GalNAc–Sp8	5659.6
65	Fuca1-2Galb1-4(Fuca1-3)GlcNAcb1-3Galb1-4(Fuca1-3)GlcNAcb1-3Galb1-4(Fuca1-3)GlcNAcb-Sp0	5628.46
70	Fuca1-2Galb1-4GlcNAcb–Sp0	5610.49
96	Gala1-3(Fuca1-2)Galb1-4Glcb-Sp0	5601.32
241	Neu5Aca2-6GalNAcb1-4GlcNAcb-Sp0	5586.28
201	NeuAca2-8NeuAca2-8NeuAca2-8NeuAca2-3(GalNAcb1-4)Galb1-4Glcb-Sp0	5572.47
244	Neu5Aca2-6Galb1-4GlcNAcb–Sp8	5567.2
57	Fuca1-2Galb1-3GalNAca-Sp8	5561.58
83	GalNAca1-3GalNAcb–Sp8	5534.61
238	Neu5Aca2-3Galb1-4Glcb–Sp8	5534.28
114	Galb1-3(Fuca1-4)GlcNAcb1-3Galb1-4GlcNAcb-Sp0	5496.48
97	Gala1-3(Fuca1-2)Galb–Sp8	5494.89
163	GlcNAcb1-3Galb1-4GlcNAcb-Sp8	5492.8
125	Galb1-3GalNAcb1-3Gala1-4Galb1-4Glcb-Sp0	5488.43
167	GlcNAcb1-4(GlcNAcb1-6)GalNAca-Sp8	5457.14
98	Gala1-3(Gala1-4)Galb1-4GlcNAcb-Sp8	5425.2
90	GalNAcb1-4GlcNAcb–Sp0	5396.84
77	GalNAca1-3(Fuca1-2)Galb1-3GlcNAcb-Sp0	5371.48
294	Galb1-4GlcNAcb1-3(Galb1-4GlcNAcb1-6)Galb1-4GlcNAc-Sp0	5370.15
236	Neu5Aca2-3Galb1-4GlcNAcb1-3Galb1-4GlcNAcb-Sp0	5368.54
113	Galb1-3(Fuca1-4)GlcNAcb1-3Galb1-4(Fuca1-3)GlcNAcb-Sp0	5358.34
82	GalNAca1-3(Fuca1-2)Galb–Sp8	5356.25
206	Neu5Aca2-3(6-O-Su)Galb1-4(Fuca1-3)GlcNAcb–Sp8	5333.55
220	Neu5Aca2-3Galb-Sp8	5320.61
324	NeuAc(9Ac)a2-3Galb1-3GlcNAcb-Sp0	5299.75
210	NeuAca2-3(NeuAca2-3Galb1-3GalNAcb1-4)Galb1-4Glcb-Sp0	5290.23
166	GlcNAcb1-4MDPLys	5275.09
119	Galb1-3(GlcNAcb1-6)GalNAca-Sp8	5267.83
1	Neu5Aca2-8Neu5Acb-Sp17	5241.89
200	Neu5Aca2-3Galb1-3GalNAca-Sp8	5219.7
211	Neu5Aca2-3(Neu5Aca2-6)GalNAca-Sp8	5199.74
215	Neu5Aca2-3Galb1-3(Fuca1-4)GlcNAcb–Sp8	5189.01
104	Gala1-3Galb1-4Glcb–Sp0	5183.95
155	GlcNAca1-6Galb1-4GlcNAcb-Sp8	5172.69
261	Neu5Gca2-6Galb1-4GlcNAcb–Sp0	5168.74
127	Galb1-3GalNAcb1-4Galb1-4Glcb–Sp8	5152.77
235	Neu5Aca2-3Galb1-4GlcNAcb–Sp8	5152.36
81	GalNAca1-3(Fuca1-2)Galb1-4Glcb-Sp0	5147.08
93	Gala1-3(Fuca1-2)Galb1-3GlcNAcb-Sp0	5116.27
102	Gala1-3Galb1-3GlcNAcb-Sp0	5071.11
222	NeuAca2-3Galb1-3GlcNAcb1-3Galb1-4GlcNAcb-Sp0	5038.22
31	[3OSO3]Galb1-3GalNAca-Sp8	5024.96
189	Mana1-2Mana1-3Mana-Sp9	5003.94
