# Supplementary material for: Community-Based Network Study of Protein-Carbohydrate Interactions in Plant Lectins Using Glycan Array Data
Source: PLoS One. 2014 Apr 22;9(4):e95480. doi: 10.1371/journal.pone.0095480 (PMC3995809; doi:10.1371/journal.pone.0095480)
Supplement: Table S7 — Lists of unique glycans for PP2A1 and CFT at RFU ≥5000 in the lectin-glycan network. (XLS) [file pone.0095480.s007.xls]

## Sheet: PP2A1
Chart #	Masterlist Name	RFU
374	Fuca1-3[NeuAca2-3Galb1-4]GlcNAcb1-3GalNAc-Sp14	39183.5
341	Neu5Aca2-6Galb1-4GlcNAcb1-2Mana1-3(Mana1-6)Manb1-4GlcNAcb1-4GlcNAc-Sp12	36594.9
343	Neu5Aca2-6Galb1-4GlcNAcb1-2Mana1-3Manb1-4GlcNAcb1-4GlcNAc-Sp12	36010.4
346	Galb1-4GlcNAcb1-2Mana1-3(Mana1-6)Manb1-4GlcNAcb1-4GlcNAcb-Sp12	35593.4
318	Neu5Aca2-6Galb1-4GlcNAcb1-2Mana1-3(GlcNAcb1-2Mana1-6)Manb1-4GlcNAcb1-4GlcNAcb-Sp12	35114
191	Mana1-2Mana1-6(Mana1-3)Mana1-6(Mana2Mana2Mana1-3)Manb1-4GlcNAcb1-4GlcNAcb-Sp12	34300.6
50	GlcNAcb1-2Mana1-3(GlcNAcb1-2Mana1-6)Manb1-4GlcNAcb1-4GlcNAcb-Sp13	32217.2
171	GlcNAcb1-4GlcNAcb1-4GlcNAcb–Sp8	32162.3
49	Mana1-3(Mana1-6)Manb1-4GlcNAcb1-4GlcNAcb-Sp13	31931.7
308	Mana1-3(Mana1-6)Manb1-4GlcNAcb1-4GlcNAcb-Sp12	31896.4
190	Mana1-6(Mana1-2Mana1-3)Mana1-6(Mana2Mana1-3)Manb1-4GlcNAcb1-4GlcNAcb-Sp12	31374.2
195	Mana1-6(Mana1-3)Mana1-6(Mana2Mana1-3)Manb1-4GlcNAcb1-4GlcNAcb-Sp12	31155.6
371	Fuca1-2Galb1-3(Fuca1-4)GlcNAcb1-2Mana1-3[Fuca1-2Galb1-3(Fuca1-4)GlcNAcb1-2Mana1-6]Manb1-4GlcNAcb1-4GlcNAcb-Sp19	30799.8
303	GlcNAcb1-2Mana1-3(GlcNAcb1-2Mana1-6)Manb1-4GlcNAcb1-4GlcNAcb-Sp12	30491.4
196	Mana1-6(Mana1-3)Mana1-6(Mana1-3)Manb1-4GlcNAcb1-4 GlcNAcb-Sp12	30339.7
47	9NAcNeu5Aca-Sp8	28086
359	Gala1-3Galb1-4GlcNAcb1-2Mana1-3(Gala1-3Galb1-4GlcNAcb1-2Mana1-6)Manb1-4GlcNAcb1-4GlcNAcb-Sp20	27360.1
4	Galb1-3GlcNAcb1-2Mana1-3(Galb1-3GlcNAcb1-2Mana1-6)Manb1-4GlcNAcb1-4GlcNAcb-Sp19	23609.2
367	Gala1-3(Fuca1-2)Galb1-4GlcNAcb1-2Mana1-3[Gala1-3(Fuca1-2)Galb1-4GlcNAcb1-2Mana1-6]Manb1-4GlcNAcb1-4GlcNAcb-Sp20	22269.8
360	Mana1-3(Galb1-4GlcNAcb1-2Mana1-6)Manb1-4GlcNAcb1-4GlcNAcb-Sp12	21657.4
358	Fuca1-2Galb1-4(Fuca1-3)GlcNAcb1-2Mana1-3[Fuca1-2Galb1-4(Fuca1-3)GlcNAcb1-2Mana1-6]Manb1-4GlcNAcb1-4GlcNAb-Sp20	18606.9
169	(GlcNAcb1-4)6b-Sp8	18172.8
337	GlcNAca1-4Galb1-4GlcNAcb1-3Galb1-4(Fuca1-3)GlcNAcb1-3Galb1-4(Fuca1-3)GlcNAcb-Sp0	16929.3
52	Neu5Aca2-6Galb1-4GlcNAcb1-2Mana1-3(Neu5Aca2-6Galb1-4GlcNAcb1-2Mana1-6)Manb1-4GlcNAcb1-4GlcNAcb-Sp13	16709.4
366	GalNAca1-3(Fuca1-2)Galb1-4GlcNAcb1-2Mana1-3[GalNAca1-3(Fuca1-2)Galb1-4GlcNAcb1-2Mana1-6]Manb1-4GlcNAcb1-4GlcNAcb-Sp20	14333.9
345	Galb1-4GlcNAcb1-2Mana1-6Manb1-4GlcNAcb1-4GlcNAc-Sp12	14310.6
344	Galb1-4GlcNAcb1-2Mana1-3Manb1-4GlcNAcb1-4GlcNAc-Sp12	13982.5
356	Fuca1-2Galb1-3GlcNAcb1-2Mana1-3(Fuca1-2Galb1-3GlcNAcb1-2Mana1-6)Manb1-4GlcNAcb1-4GlcNAcb-Sp20	13393.2
51	Galb1-4GlcNAcb1-2Mana1-3(Galb1-4GlcNAcb1-2Mana1-6)Manb1-4GlcNAcb1-4GlcNAcb-Sp13	12218.5
375	GalNAcb1-4GlcNAcb1-2Mana1-6(GalNAcb1-4GlcNAcb1-2Mana1-6)Manb1-4GlcNAcb1-4GlcNAc-Sp12	11763.5
319	Neu5Aca2-6Galb1-4GlcNAcb1-2Mana1-3(Neu5Aca2-6Galb1-4GlcNAcb1-2Mana1-6)Manb1-4GlcNAcb1-4GlcNAcb-N(LT)AVL	11117.4
357	Fuca1-2Galb1-4GlcNAcb1-2Mana1-3(Fuca1-2Galb1-4GlcNAcb1-2Mana1-6)Manb1-4GlcNAcb1-4GlcNAcb-Sp20	10955.3
348	Galb1-4GlcNAcb1-2Mana1-3(Galb1-4GlcNAcb1-2Mana1-6)Manb1-4GlcNAcb1-4(Fuca1-6)GlcNAcb-Sp22	10850.2
197	Neu5Aca2-6Galb1-4GlcNAcb1-2Mana1-3(Neu5Aca2-3Galb1-4GlcNAcb1-2Mana1-6)Manb1-4GlcNAcb1-4GlcNAcb-Sp12	10776.8
170	(GlcNAcb1-4)5b-Sp8	10738.2
192	Mana1-2Mana1-2Mana1-3(Mana1-2Mana1-3(Mana1-2Mana1-6)Mana1-6)Manb1-4GlcNAcb1-4GlcNAcb-Sp12	10568.5
349	Galb1-3GlcNAcb1-2Mana1-3(Galb1-3GlcNAcb1-2Mana1-6)Manb1-4GlcNAcb1-4(Fuca1-6)GlcNacb-Sp22	9865.91
141	Neu5Aca2-3Galb1-4GlcNAcb1-2Mana1-3(Neu5Aca2-3Galb1-4GlcNAcb1-2Mana1-6)Manb1-4GlcNAcb1-4GlcNAcb-Sp12	9500.29
340	Mana1-3(Neu5Aca2-6Galb1-4GlcNAcb1-2Mana1-6)Manb1-4GlcNAcb1-4GlcNAc-Sp12	9258.9
5	Neu5Aca2-6Galb1-4GlcNAcb1-2Mana1-3(Neu5Aca2-6Galb1-4GlcNAcb1-2Mana1-6)Manb1-4GlcNAcb1-4GlcNAcb-Sp12	9093.82
314	Neu5Aca2-3Galb1-3(Neu5Aca2-6)GalNAc-Sp14	9090.46
302	GlcNAcb1-2Mana1-3(Neu5Aca2-6Galb1-4GlcNAcb1-2Mana1-6)Manb1-4GlcNAcb1-4GlcNAcb-Sp12	7422.19
339	GlcNAca1-4Galb1-3GalNAc-Sp14	7365.8
316	Neu5Aca2-3Galb1-4GlcNAcb1-2Mana1-3(Neu5Aca2-6Galb1-4GlcNAcb1-2Mana1-6)Manb1-4GlcNAcb1-4GlcNAcb-Sp12	7361.27
350	Galb1-3(Fuca1-4)GlcNAcb1-2Mana1-3[Galb1-3(Fuca1-4)GlcNAcb1-2Mana1-6]Manb1-4GlcNAcb1-4GlcNAcb-Sp19	6697.29
293	Galb1-4GlcNAcb1-2Mana1-3(Neu5Aca2-6Galb1-4GlcNAcb1-2Mana1-6)Manb1-4GlcNAcb1-4GlcNAcb-Sp12	6689
317	Neu5Aca2-6Galb1-4GlcNAcb1-2Mana1-3(Galb1-4GlcNAcb1-2Mana1-6)Manb1-4GlcNAcb1-4GlcNAcb-Sp12	6683.33
365	Galb1-4GlcNAcb1-2(Galb1-4GlcNAcb1-4)Mana1-3[Galb1-4GlcNAcb1-2Mana1-6]Manb1-4GlcNAcb1-4GlcNAc-Sp21	6356.89
53	Neu5Aca2-6Galb1-4GlcNAcb1-2Mana1-3(Neu5Aca2-6Galb1-4GlcNAcb1-2Mana1-6)Manb1-4GlcNAcb1-4GlcNAcb-Sp8	6109.57
373	NeuAca2-6Galb1-4GlcNAcb1-3GalNAc-Sp14	5947.1
40	6-H2PO3Mana-Sp8	5900.22
368	Gala1-3Galb1-4(Fuca1-3)GlcNAcb1-2Mana1-3[Gala1-3Galb1-4(Fuca1-3)GlcNAcb1-2Mana1-6]Manb1-4GlcNAcb1-4GlcNAcb-Sp20	5721.82
370	Gala1-3(Fuca1-2)Galb1-3GlcNAcb1-2Mana1-3[Gala1-3(Fuca1-2)Galb1-3GlcNAcb1-2Mana1-6]Manb1-4GlcNAcb1-4GlcNAcb-Sp20	5659.1
338	GlcNAca1-4Galb1-4GlcNAcb1-3Galb1-4GlcNAcb-Sp0	5576.39
342	Neu5Aca2-6Galb1-4GlcNAcb1-2Mana1-6Manb1-4GlcNAcb1-4GlcNAc-Sp12	5502.85
347	GlcNAcb1-2Mana1-3(GlcNAcb1-2Mana1-6)Manb1-4GlcNAcb1-4(Fuca1-6)GlcNAcb-Sp22	5352.19

## Sheet: Codium fragile lectin
Chart #	Masterlist Name	RFU
106	Gala1-3(Fuca1-2)Galb1-4GlcNAc-Sp0	56668.9
469	Gala1-3(Fuca1-2)Galb1-3GalNAcb-Sp8	49510.8
89	GlcNAcb1-3Galb1-3GalNAca-Sp8	49143.9
567	GlcNAb1-3Galb1-3GalNAc-Sp14	48031.5
561	Gala1-3Galb1-4GlcNAcb1-2Mana1-6(Gala1-3Galb1-4GlcNAcb1-2Mana1-3)Manb1-4GlcNAcb1-4GlcNAc-Sp24	47108.7
140	Galb1-3GalNAca-Sp8	47021.1
93	GalNAca1-3Galb-Sp8	46745.4
510	Galb1-3GlcNAca1-3Galb1-4GlcNAcb-Sp8	46482.5
114	Gala1-3Galb1-4(Fuca1-3)GlcNAcb-Sp8	45566
237	Neu5Aca2-3GalNAca-Sp8	45366.5
105	Gala1-3(Fuca1-2)Galb1-4(Fuca1-3)GlcNAcb-Sp8	44658.8
224	Neu5Aca2-3Galb1-3GalNAca-Sp8	44364.9
29	(3S)Galb1-3GalNAca-Sp8	44216
400	Neu5Aca2-3Galb1-3GlcNAcb1-3GalNAca-Sp14	44181.4
496	Gala1-3Galb1-4GlcNAcb1-6GalNAca-Sp14	43448.6
181	GlcNAcb1-3GalNAca-Sp14	43067.9
111	Gala1-3GalNAca-Sp8	42758.8
180	GlcNAcb1-3GalNAca-Sp8	42586.9
344	GlcNAca1-4Galb1-4GlcNAcb1-3Galb1-4GlcNAcb-Sp0	42565.7
95	GalNAcb1-3GalNAca-Sp8	42332.7
175	GlcNAca1-6Galb1-4GlcNAcb-Sp8	42271.6
120	Gala1-4(Fuca1-2)Galb1-4GlcNAcb-Sp8	41941.8
371	GalNAca1-3(Fuca1-2)Galb1-4GlcNAcb1-2Mana1-6(GalNAca1-3(Fuca1-2)Galb1-4GlcNAcb1-2Mana1-3)Manb1-4GlcNAcb1-4GlcNAcb-Sp20	41797.8
528	Gala1-3Galb1-3GlcNAcb1-2Mana-Sp0	41716.5
414	Gala1-3(Fuca1-2)Galb1-4GlcNAcb1-3GalNAca-Sp14	41623.3
392	Galb1-3GlcNAcb1-3GalNAca-Sp14	41005.3
375	Gala1-3(Fuca1-2)Galb1-3GlcNAcb1-2Mana1-6(Gala1-3(Fuca1-2)Galb1-3GlcNAcb1-2Mana1-3)Manb1-4GlcNAcb1-4GlcNAcb-Sp20	40928.7
451	Gala1-3(Fuca1-2)Galb1-4GlcNAcb1-6(Gala1-3(Fuca1-2)Galb1-4GlcNAcb1-3)GalNAc-Sp14	40674.6
373	Gala1-3Galb1-4(Fuca1-3)GlcNAcb1-2Mana1-6(Gala1-3Galb1-4(Fuca1-3)GlcNAcb1-2Mana1-3)Manb1-4GlcNAcb1-4GlcNAcb-Sp20	40548.4
390	Fuca1-2Galb1-3GalNAca1-3(Fuca1-2)Galb1-4Glcb-Sp0	40487.4
404	Gala1-4Galb1-3GlcNAcb1-2Mana1-6(Gala1-4Galb1-3GlcNAcb1-2Mana1-3)Manb1-4GlcNAcb1-4GlcNAcb-Sp19	40398.9
16	GlcNAcb-Sp0	40375.8
377	Neu5Aca2-3Galb1-4GlcNAcb1-3GalNAc-Sp14	40221.7
393	GalNAcb1-4(Neu5Aca2-3)Galb1-4GlcNAcb1-3GalNAca-Sp14	39995
30	(3S)Galb1-3GlcNAcb-Sp0	39938.5
600	Galb1-4GlcNAcb1-3Galb1-3GalNAca-Sp14	39739.2
116	Gala1-3Galb1-4GlcNAcb-Sp8	39628.5
490	Gala1-3Galb1-3GlcNAcb1-6GalNAca-Sp14	39539.5
225	Neu5Aca2-3Galb1-3GalNAca-Sp14	39347.4
598	Neu5Aca2-6Galb1-4GlcNAcb1-3Galb1-4GlcNAcb1-3GalNAca-Sp14	38906.5
599	GlcNAcb1-3Galb1-4GlcNAcb1-3Galb1-4GlcNAcb1-3GalNAca-Sp14	38834.6
394	GalNAca1-3(Fuca1-2)Galb1-3GalNAca1-3(Fuca1-2)Galb1-4GlcNAcb-Sp0	38741.2
416	GalNAca1-3GalNAcb1-3Gala1-4Galb1-4Glcb-Sp0	38656.7
342	GlcNAca1-4Galb1-4GlcNAcb1-3Galb1-4Glcb-Sp0	38192.5
161	Galb1-4GlcNAcb1-3GalNAc-Sp14	38005.3
294	Galb1-4GlcNAcb1-3Galb1-3GlcNAcb-Sp0	37901.3
62	Fuca1-2Galb1-3GalNAca-Sp8	37854.3
63	Fuca1-2Galb1-3GalNAca-Sp14	37527.9
141	Galb1-3GalNAca-Sp14	37307.8
426	Gala1-3Galb1-3GlcNAcb1-3GalNAc-Sp14	36336.7
522	Gala1-3Galb1-4GlcNAcb1-2Mana-Sp0	35777
378	Neu5Aca2-6Galb1-4GlcNAcb1-3GalNAc-Sp14	35662.7
337	GalNAca1-3(Fuca1-2)Galb1-4GlcNAcb1-3Galb1-4GlcNAcb1-3Galb1-4GlcNAcb-Sp0	35385.5
590	Galb1-4GlcNAcb1-3Galb1-4GlcNAcb1-3GalNAca-Sp14	35156
176	GlcNAcb1-2Galb1-3GalNAca-Sp8	35051.5
122	Gala1-4Galb1-4GlcNAcb-Sp8	34983.3
594	GlcNAcb1-3Galb1-4GlcNAcb1-3GalNAca-Sp14	34803.8
401	Fuca1-2Galb1-4GlcNAcb1-3GalNAca-Sp14	34730.3
91	GalNAca1-3(Fuca1-2)Galb-Sp18	34721.5
340	GlcNAca1-4Galb1-4GlcNAcb-Sp0	34343
87	GalNAca1-3(Fuca1-2)Galb1-4GlcNAcb-Sp8	34164.9
5	GalNAca-Sp15	34105
150	Galb1-3GlcNAcb-Sp0	34031
115	Gala1-3Galb1-3GlcNAcb-Sp0	33873
391	Fuca1-2Galb1-3GalNAca1-3(Fuca1-2)Galb1-4GlcNAcb-Sp0	33425.2
331	Neu5Aca2-6Galb1-4GlcNAcb1-3Galb1-3GlcNAcb-Sp0	33020.8
82	Fucb1-3GlcNAcb-Sp8	32696.3
151	Galb1-3GlcNAcb-Sp8	32693.2
423	Fuca1-2Galb1-3GlcNAcb1-3GalNAc-Sp14	32594.4
381	Galb1-3GalNAca1-3(Fuca1-2)Galb1-4Glc-Sp0	32480.3
113	Gala1-3GalNAcb-Sp8	32152.5
406	Gala1-3Galb1-4GlcNAcb1-3GalNAca-Sp14	32103.4
108	Gala1-3(Fuca1-2)Galb-Sp8	31725.2
345	GlcNAca1-4Galb1-3GalNAc-Sp14	31022.2
101	Gala1-2Galb-Sp8	30927.4
247	Neu5Aca2-3Galb1-3GalNAcb1-3Gala1-4Galb1-4Glcb-Sp0	30739.4
409	GalNAcb1-3Gala1-6Galb1-4Glcb-Sp8	30297.7
282	Neu5Gca2-3Galb1-3GlcNAcb-Sp0	30219.8
563	GalNAcb1-3GlcNAcb-Sp0	30175.9
84	GalNAca1-3(Fuca1-2)Galb1-4(Fuca1-3)GlcNAcb-Sp0	30047.8
103	Gala1-3(Fuca1-2)Galb1-3GlcNAcb-Sp8	29704.3
330	Neu5,9Ac2a2-3Galb1-3GlcNAcb-Sp0	29623.4
15	GalNAcb-Sp8	29588.4
335	GalNAcb1-3Gala1-4Galb1-4GlcNAcb1-3Galb1-4Glcb-Sp0	28858
102	Gala1-3(Fuca1-2)Galb1-3GlcNAcb-Sp0	27399.2
118	Gala1-3Galb1-4Glc-Sp10	26453.1
593	Neu5Aca2-3Galb1-4GlcNAcb1-3Galb1-4GlcNAcb1-3GalNAca-Sp14	26260.6
395	Gala1-3Galb1-3GlcNAcb1-2Mana1-6(Gala1-3Galb1-3GlcNAcb1-2Mana1-3)Manb1-4GlcNAcb1-4GlcNAc-Sp19	26079.5
308	GlcAb1-3GlcNAcb-Sp8	25965.6
402	Galb1-4(Fuca1-3)GlcNAcb1-3GalNAca-Sp14	25856.8
296	Neu5Aca2-3Galb1-4GlcNAcb1-3Galb1-3GlcNAcb-Sp0	25350
418	Gala1-3(Fuca1-2)Galb1-4(Fuca1-3)GlcNAcb1-3GalNAc-Sp14	25287.5
424	Gala1-3(Fuca1-2)Galb1-3GlcNAcb1-3GalNAc-Sp14	24787
455	GalNAca1-3(Fuca1-2)Galb1-4GlcNAcb1-2Mana1-6(GalNAca1-3(Fuca1-2)Galb1-4GlcNAcb1-2Mana1-3)Manb1-4GlcNAcb1-4(Fuca1-6)GlcNAcb-Sp22	23798.7
538	Gala1-3(Fuca1-2)Galb1-3GalNAcb1-3Gala1-4Galb1-4Glc-Sp21	23463.6
144	Galb1-3GalNAcb1-3Gala1-4Galb1-4Glcb-Sp0	23087.4
143	Galb1-3GalNAcb-Sp8	22745
250	Neu5Aca2-3Galb1-3GlcNAcb-Sp0	22124.7
107	Gala1-3(Fuca1-2)Galb1-4Glcb-Sp0	21838.4
360	KDNa2-3Galb1-3GalNAca-Sp14	21515.7
142	Galb1-3GalNAca-Sp16	21338.9
110	Gala1-4(Gala1-3)Galb1-4GlcNAcb-Sp8	21109.7
97	GalNAcb1-3Gala1-4Galb1-4GlcNAcb-Sp0	20679.7
405	Gala1-4Galb1-4GlcNAcb1-2Mana1-6(Gala1-4Galb1-4GlcNAcb1-2Mana1-3)Manb1-4GlcNAcb1-4GlcNAcb-Sp24	19852.2
304	GlcNAcb1-6(Galb1-4GlcNAcb1-3)Galb1-4GlcNAc-Sp0	19129
403	GalNAca1-3GalNAcb1-3Gala1-4Galb1-4GlcNAcb-Sp0	19118.9
444	(6S)Galb1-3GlcNAcb-Sp0	18557.4
610	GlcNAcb1-3Fuca-Sp21	18396.2
408	Galb1-3GlcNAca1-6Galb1-4GlcNAcb-Sp0	17407.1
1	Gala-Sp8	17169.2
124	Gala1-4GlcNAcb-Sp8	17107.4
524	GalNAca1-3(Fuca1-2)Galb1-4 GlcNAcb1-2Mana-Sp0	16872
290	Galb1-3GlcNAcb1-3Galb1-3GlcNAcb-Sp0	16626.4
109	Gala1-3(Fuca1-2)Galb-Sp18	15242.3
104	Gala1-3(Fuca1-2)Galb1-4(Fuca1-3)GlcNAcb-Sp0	15181.4
410	Gala1-3(Fuca1-2)Galb1-4(Fuca1-3)Glcb-Sp21	14732.6
334	Gala1-4Galb1-4GlcNAcb1-3Galb1-4Glcb-Sp0	14516.3
119	Gala1-3Galb-Sp8	14304.4
4	GalNAca-Sp8	14272.1
520	GalNAca1-3(Fuca1-2)Galb1-4GlcNAcb1-6GalNAc-Sp14	14249.3
372	Gala1-3(Fuca1-2)Galb1-4GlcNAcb1-2Mana1-6(Gala1-3(Fuca1-2)Galb1-4GlcNAcb1-2Mana1-3)Manb1-4GlcNAcb1-4GlcNAcb-Sp20	14096
94	GalNAca1-4(Fuca1-2)Galb1-4GlcNAcb-Sp8	13414.8
379	Neu5Aca2-3Galb1-4(Fuca1-3)GlcNAcb1-3GalNAca-Sp14	13397.6
374	GalNAca1-3(Fuca1-2)Galb1-3GlcNAcb1-2Mana1-6(GalNAca1-3(Fuca1-2)Galb1-3GlcNAcb1-2Mana1-3)Manb1-4GlcNAcb1-4GlcNAcb-Sp20	13156
17	GlcNAcb-Sp8	12934.6
86	GalNAca1-3(Fuca1-2)Galb1-4GlcNAcb-Sp0	12690.9
364	Gala1-3Galb1-4GlcNAcb1-2Mana1-6(Gala1-3Galb1-4GlcNAcb1-2Mana1-3)Manb1-4GlcNAcb1-4GlcNAcb-Sp20	12617.9
92	GalNAca1-3GalNAcb-Sp8	12264.5
195	GlcNAcb1-6Galb1-4GlcNAcb-Sp8	12264.4
339	GlcNAca1-4Galb1-4GlcNAcb1-3Galb1-4GlcNAcb1-3Galb1-4GlcNAcb-Sp0	12082.8
251	Neu5Aca2-3Galb1-3GlcNAcb-Sp8	11555.3
396	Gala1-3Galb1-3(Fuca1-4)GlcNAcb1-2Mana1-6(Gala1-3Galb1-3(Fuca1-4)GlcNAcb1-2Mana1-3)Manb1-4GlcNAcb1-4GlcNAc-Sp19	11532.6
452	GalNAca1-3(Fuca1-2)Galb1-4GlcNAcb1-6(GalNAca1-3(Fuca1-2)Galb1-4GlcNAcb1-3)GalNAc-Sp14	11245.5
121	Gala1-4Galb1-4GlcNAcb-Sp0	11190.6
59	Fuca1-2Galb1-3GalNAcb1-3Gala-Sp9	10982.1
88	GalNAca1-3(Fuca1-2)Galb1-4Glcb-Sp0	10723.8
83	GalNAca1-3(Fuca1-2)Galb1-3GlcNAcb-Sp0	10442.2
507	GalNAca1-3(Fuca1-2)Galb1-3GlcNAcb1-6GalNAca-Sp14	10315.8
60	Fuca1-2Galb1-3GalNAcb1-3Gala1-4Galb1-4Glcb-Sp9	10071.1
430	Galb1-4GlcNAcb1-6(Fuca1-2Galb1-3GlcNAcb1-3)Galb1-4Glc-Sp21	10016.2
90	GalNAca1-3(Fuca1-2)Galb-Sp8	9404.33
160	Galb1-4GlcNAcb1-3GalNAca-Sp8	9380.27
415	GalNAca1-3(Fuca1-2)Galb1-4GlcNAcb1-3GalNAca-Sp14	9188.47
174	GlcNAca1-3Galb1-4GlcNAcb-Sp8	9115.1
425	GalNAca1-3(Fuca1-2)Galb1-3GlcNAcb1-3GalNAc-Sp14	8559.17
193	GlcNAcb1-6GalNAca-Sp8	8530.93
428	Gala1-3(Fuca1-2)Galb1-4GlcNAcb1-2Mana1-6(Gala1-3(Fuca1-2)Galb1-4GlcNAcb1-2Mana1-3)Manb1-4GlcNAcb1-4(Fuca1-6)GlcNAcb-Sp22	8075.76
608	Neu5Aca2-3Galb1-4GlcNAcb1-3Galb1-4GlcNAcb1-3Galb1-4GlcNAcb1-2Mana1-6(Neu5Aca2-3Galb1-4GlcNAcb1-3Galb1-4GlcNAcb1-3Galb1-4GlcNAcb1-2Mana1-3)Manb1-4GlcNAcb1-4GlcNAcb-Sp12	7816.25
112	Gala1-3GalNAca-Sp16	7576
336	GalNAca1-3(Fuca1-2)Galb1-4GlcNAcb1-3Galb1-4GlcNAcb-Sp0	7521.02
117	Gala1-3Galb1-4Glcb-Sp0	7367.33
123	Gala1-4Galb1-4Glcb-Sp0	7357.9
537	GalNAca1-3(Fuca1-2)Galb1-3GalNAcb1-3Gala1-4Galb1-4Glc-Sp21	7019.68
382	Galb1-3GalNAca1-3(Fuca1-2)Galb1-4GlcNAc-Sp0	6884.73
179	GlcNAcb1-6(GlcNAcb1-3)Galb1-4GlcNAcb-Sp8	6525.73
341	GlcNAca1-4Galb1-3GlcNAcb-Sp0	5851.83
542	Galb1-4GlcNAcb1-3Galb1-4GlcNAcb1-2Mana1-6(Galb1-4GlcNAcb1-3Galb1-4GlcNAcb1-2Mana1-3)Manb1-4GlcNAcb1-4GlcNAcb-Sp12	5826.42
31	(3S)Galb1-3GlcNAcb-Sp8	5802.41
206	KDNa2-3Galb1-3GlcNAcb-Sp0	5761.84
343	GlcNAca1-4Galb1-4GlcNAcb1-3Galb1-4(Fuca1-3)GlcNAcb1-3Galb1-4(Fuca1-3)GlcNAcb-Sp0	5745.43
236	Neu5Aca2-6(Neu5Aca2-3)GalNAca-Sp8	5674.05
135	GlcNAcb1-6(Galb1-3)GalNAca-Sp14	5547.13
419	GalNAca1-3(Fuca1-2)Galb1-4(Fuca1-3)GlcNAcb1-3GalNAc-Sp14	5505.89
458	GalNAca1-3(Fuca1-2)Galb1-3GlcNAcb1-2Mana1-6(GalNAca1-3(Fuca1-2)Galb1-3GlcNAcb1-2Mana1-3)Manb1-4GlcNAcb1-4(Fuca1-6)GlcNAcb-Sp22	5485.79
190	GlcNAcb1-4GlcNAcb1-4GlcNAcb1-4GlcNAcb1-4GlcNAcb1-4GlcNAcb1-Sp8	5230.35
191	GlcNAcb1-4GlcNAcb1-4GlcNAcb1-4GlcNAcb1-4GlcNAcb1-Sp8	5138.99
286	Neu5Gca2-6GalNAca-Sp0	5056.42
